# Supplementary material for: Seeing the forest for the trees: Assessing genetic offset predictions from gradient forest
Source: PubMed Central journal article supplement (PMC8965365; doi:10.1111/eva.13354), 2022-02-25

**A**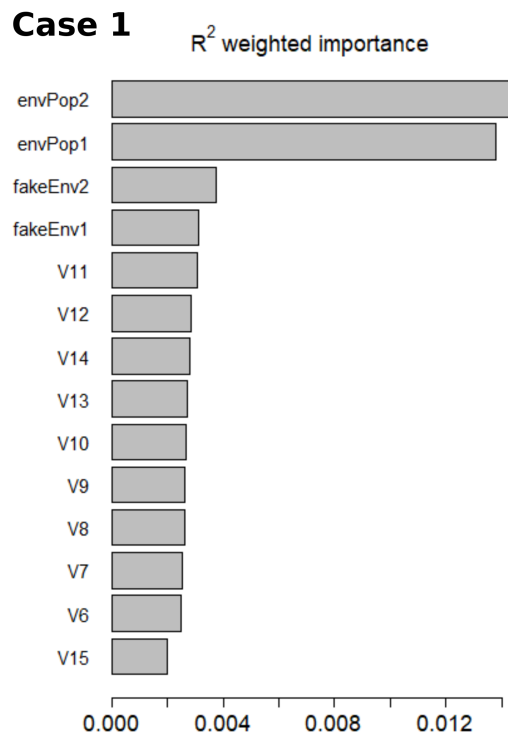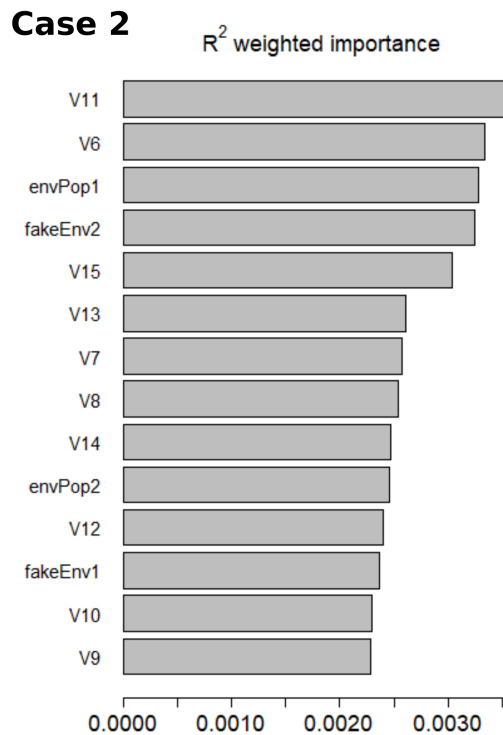**B**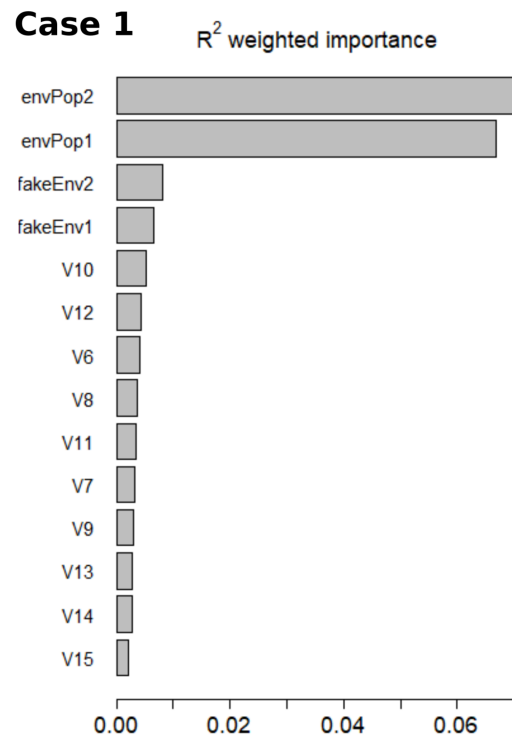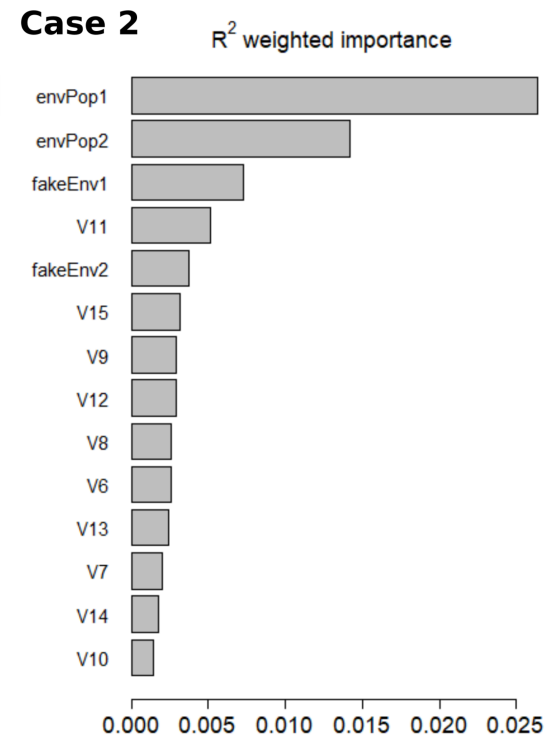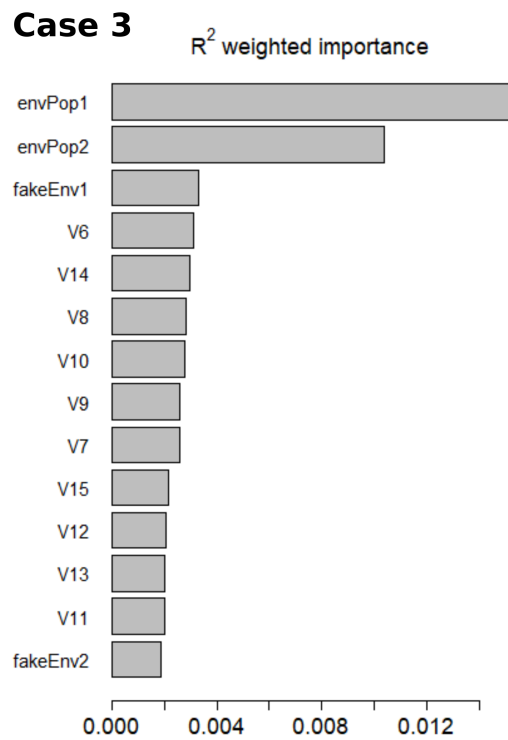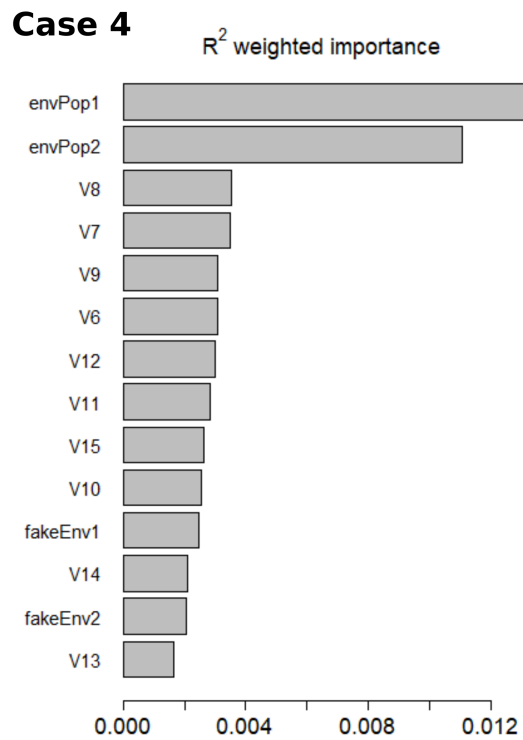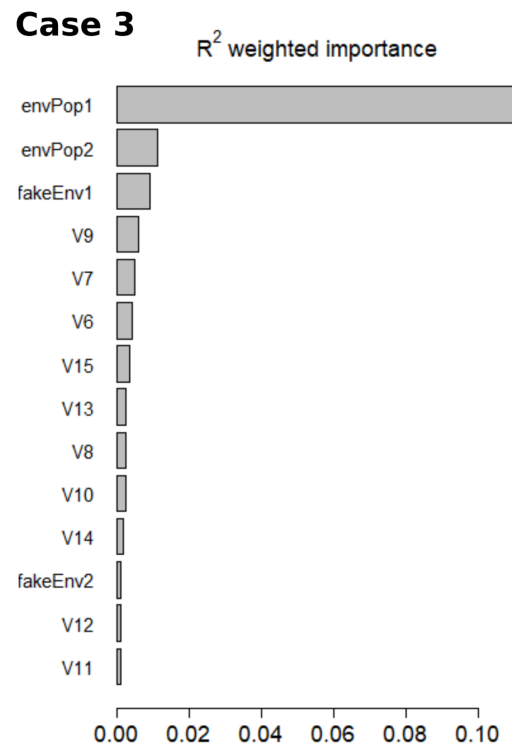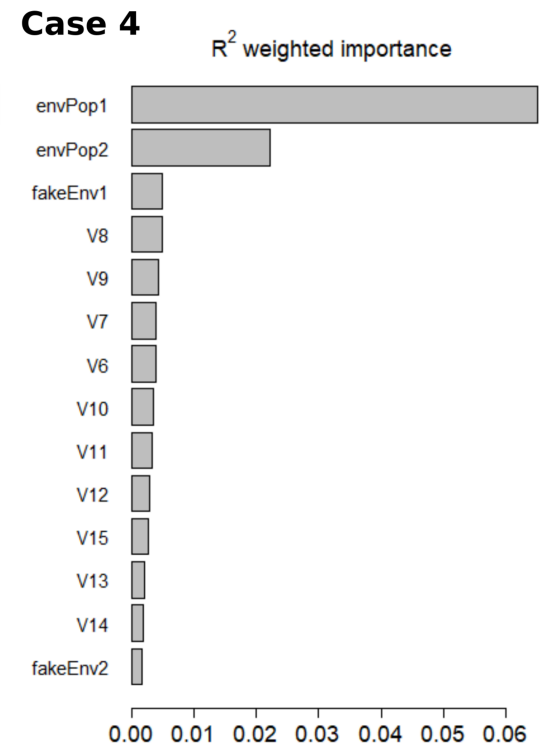

Supplement: EVA-15-403-s004.pdf [file EVA-15-403-s004.pdf]
