# Supplementary material for: Seeing the forest for the trees: Assessing genetic offset predictions from gradient forest
Source: PubMed Central journal article supplement (PMC8965365; doi:10.1111/eva.13354), 2022-02-25

Case 1

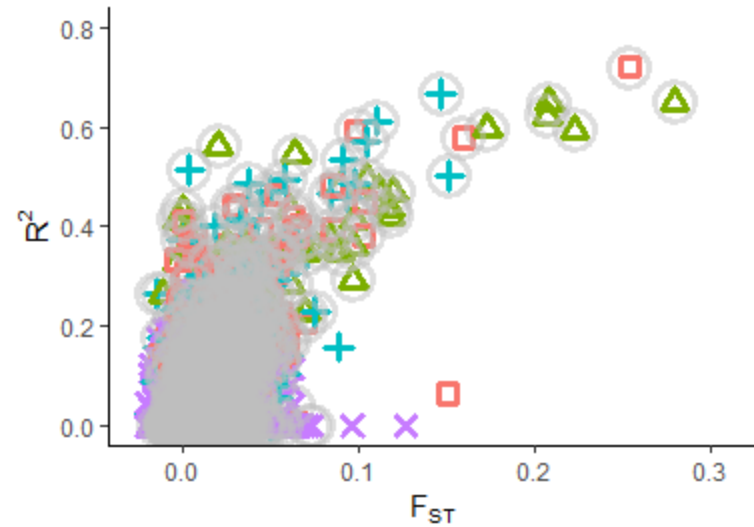

Case 2

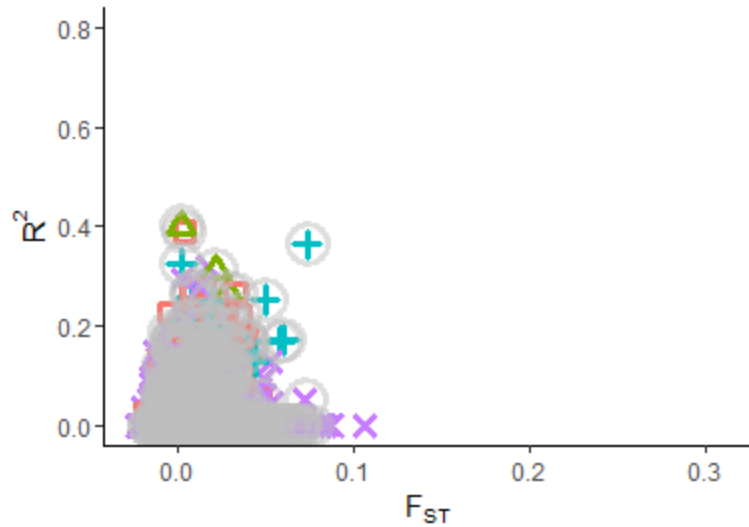Environmental  
Correlation

E1

E1 &amp; E2

E2

Not correlated

Case 3

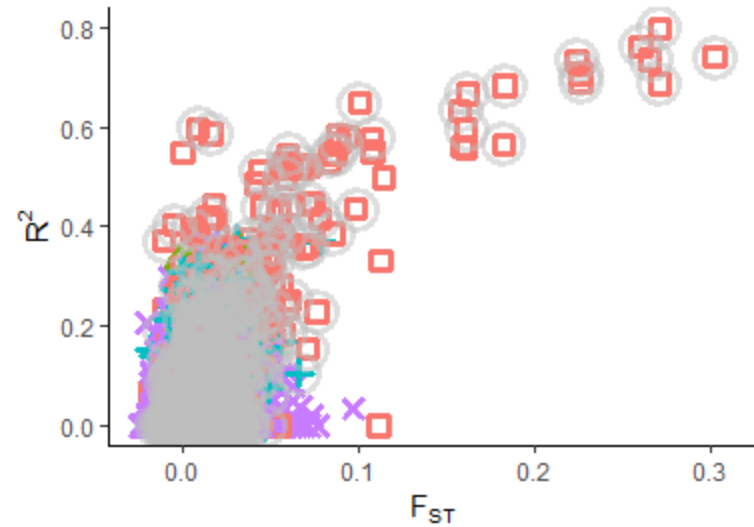

Case 4

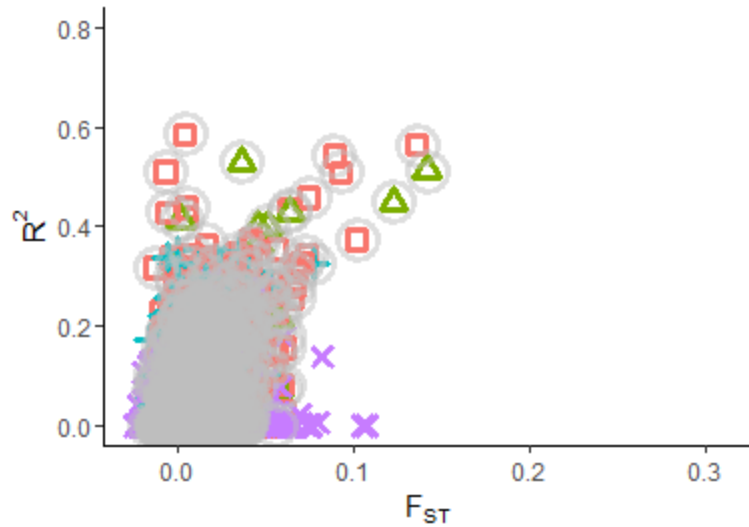

Supplement: EVA-15-403-s005.pdf [file EVA-15-403-s005.pdf]
